# Supplementary material for: SnoRD126 promotes the proliferation of hepatocellular carcinoma cells through transcriptional regulation of FGFR2 activation in combination with hnRNPK
Source: publisher site journal article supplement (doi:10.18632/aging.203014), 2021-04-23
Supplement: Supplementary file [file aging-v13i9-203014-supplementary-material-SD1.pdf]

**SUPPLEMENTARY FIGURES**

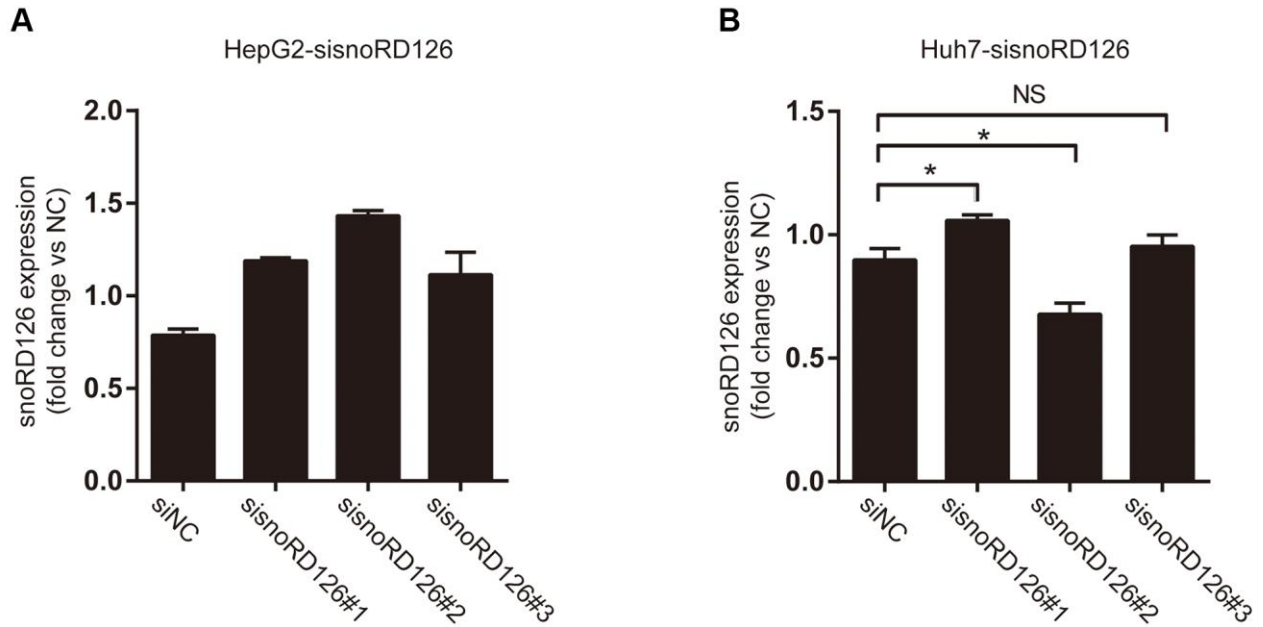

**Supplementary Figure 1.** (A, B) qRT-PCR assay for snoRD126 expression in (A) HepG2 cells and (B) Huh7 cells after treatment with siRNAs targeting snoRD126. Mean ± SD, \*P<0.05, NS, not significant.

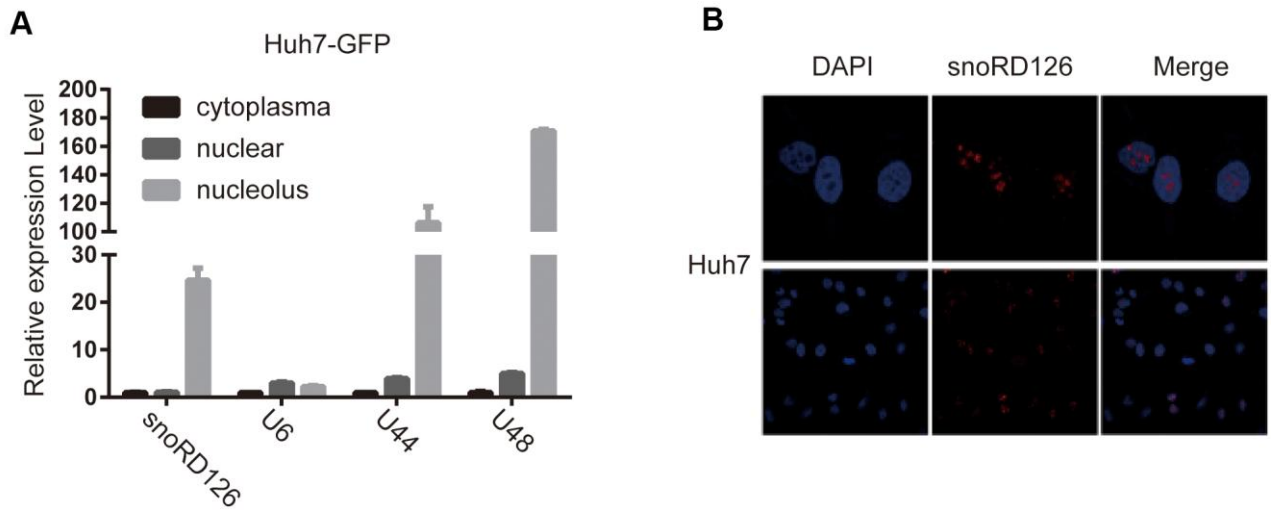

**Supplementary Figure 2.** (A) The nucleo-cytoplasmic separation experiment was performed in Huh7 cells, and the qRT-PCR assay detected the expression of snoRD126, U6, U44, and U48 in the cytoplasm, nuclear and nucleolus segment. (B) Fluorescent *in situ* hybridization (FISH) analysis experiment was performed in Huh7 cells.
